# Supplementary material for: Perspective of ophthalmology residents in the United States about residency programs and competency in relation to the International Council of Ophthalmology guidelines
Source: PubMed Central journal article supplement — J Curr Ophthalmol. 2016 Jun 23;28(3):146–51. doi: 10.1016/j.joco.2016.06.001 (PMC4992122; doi:10.1016/j.joco.2016.06.001), 2016-06-23
Supplement: mmc1.pdf [file mmc1.pdf]

Survey

**Demographic Information**

**1) Which state do/did you receive your training in?** *Dropdown List Appears*

**2) What program do/did you get your training at?** *Dropdown List Appears*

**3) What is your current level of training?**

- PGY-3 Resident
- PGY-4 Resident
- 2014 Graduate
- 2013 Graduate
- 2012 Graduate
- 2011 Graduate

**4) If you are a residency graduate, what is your current work status?**

- Fellow in the US       Fellow internationally
- Pursuing fellowship in the US       Pursuing fellowship internationally
- Working in a community practice       Working in an academic practice

**General Satisfaction**

**5) What is your overall level of satisfaction with your ophthalmology residency program?**

- Very Satisfied     Satisfied
- Neutral
- Unsatisfied       Very Unsatisfied

**6) How do you feel about the operative experience in the following areas?**

|                 | <b>Very Satisfied</b>    | <b>Satisfied</b>         | <b>Neutral</b>           | <b>Unsatisfied</b>       | <b>Very Unsatisfied</b>  |
|-----------------|--------------------------|--------------------------|--------------------------|--------------------------|--------------------------|
| Case Volume     | <input type="checkbox"/> |
| Case Complexity | <input type="checkbox"/> |
| Case Variety    | <input type="checkbox"/> |

**7) How do you feel about the quality of teaching in the following settings?**

|                          | <b>Very Satisfied</b>    | <b>Satisfied</b>         | <b>Neutral</b>           | <b>Unsatisfied</b>       | <b>Very Unsatisfied</b>  |
|--------------------------|--------------------------|--------------------------|--------------------------|--------------------------|--------------------------|
| Formal didactic teaching | <input type="checkbox"/> |
| Operating room           | <input type="checkbox"/> |
| Clinic/outpatient office | <input type="checkbox"/> |
| Hospital-based rounds    | <input type="checkbox"/> |

|                                    |                          |                          |                          |                          |                          |
|------------------------------------|--------------------------|--------------------------|--------------------------|--------------------------|--------------------------|
| Grand rounds                       | <input type="checkbox"/> |
| Morbidity and mortality rounds     | <input type="checkbox"/> |
| Surgical skills/wet laboratory     | <input type="checkbox"/> |
| Videotapes of surgical procedures  | <input type="checkbox"/> |
| Surgical virtual simulation system | <input type="checkbox"/> |
| Conferences                        | <input type="checkbox"/> |
| Journal club                       | <input type="checkbox"/> |

### **Surgical Volume**

**8) How many cataract surgeries have you performed during your residency training so far?**

- |                                  |                                  |                                  |
|----------------------------------|----------------------------------|----------------------------------|
| <input type="checkbox"/> 0-49    | <input type="checkbox"/> 50-99   | <input type="checkbox"/> 100-149 |
| <input type="checkbox"/> 150-199 | <input type="checkbox"/> 200-249 | <input type="checkbox"/> 250-299 |
| <input type="checkbox"/> 300-349 | <input type="checkbox"/> 350-399 | <input type="checkbox"/> 400-449 |
| <input type="checkbox"/> 450-499 | <input type="checkbox"/> >500    | <input type="checkbox"/> Unsure  |

**9) How many trabeculectomy/tube shunt surgeries have you performed during your residency training so far?**

- 0
- <10
- 10-20
- 21-30
- 31-40
- 41-50
- >50
- Unsure

**10) How many strabismus surgeries have you performed during your residency training so far?**

- 0
- <10
- 10-20
- 21-30
- 31-40
- 41-50
- >50
- Unsure

## **Surgical Competency**

### **11) How competent do you feel performing these Cataract/Refraction procedures?**

|                                                                 | <b>Yes</b> | <b>No</b> | <b>Unsure</b> |
|-----------------------------------------------------------------|------------|-----------|---------------|
| I feel comfortable prescribing glasses                          | ( )        | ( )       | ( )           |
| I feel comfortable prescribing contact lenses                   | ( )        | ( )       | ( )           |
| I feel comfortable performing phacoemulsification               | ( )        | ( )       | ( )           |
| I feel comfortable performing extracapsular cataract extraction | ( )        | ( )       | ( )           |
| I feel comfortable implanting toric intraocular lenses          | ( )        | ( )       | ( )           |
| I feel comfortable performing refractive surgery                | ( )        | ( )       | ( )           |
| I feel comfortable performing corneal surgery                   | ( )        | ( )       | ( )           |

### **12) How competent do you feel performing these Glaucoma procedures?**

|                                                               | <b>Yes</b> | <b>No</b> | <b>Unsure</b> |
|---------------------------------------------------------------|------------|-----------|---------------|
| I feel comfortable performing glaucoma ALT/SLT                | ( )        | ( )       | ( )           |
| I feel comfortable managing complications of glaucoma surgery | ( )        | ( )       | ( )           |

### **13) How competent do you feel performing these Retinal procedures?**

|                                                                                             | <b>Yes</b> | <b>No</b> | <b>Unsure</b> |
|---------------------------------------------------------------------------------------------|------------|-----------|---------------|
| I feel comfortable performing posterior segment examinations (including scleral depression) | ( )        | ( )       | ( )           |
| I can perform vitreoretinal surgical procedures                                             | ( )        | ( )       | ( )           |

### **14) How competent do you feel performing these Oculoplastics procedures?**

|                                       | <b>Yes</b> | <b>No</b> | <b>Unsure</b> |
|---------------------------------------|------------|-----------|---------------|
| I can treat eyelid trauma             | ( )        | ( )       | ( )           |
| I can treat orbital trauma            | ( )        | ( )       | ( )           |
| I can perform lid surgical procedures | ( )        | ( )       | ( )           |

|                                            |                       |                       |                       |
|--------------------------------------------|-----------------------|-----------------------|-----------------------|
| I can perform lacrimal surgical procedures | <input type="radio"/> | <input type="radio"/> | <input type="radio"/> |
| I can perform enucleation                  | <input type="radio"/> | <input type="radio"/> | <input type="radio"/> |
| I can excise conjunctival tumours          | <input type="radio"/> | <input type="radio"/> | <input type="radio"/> |

**15) How competent do you feel performing these pediatric procedures?**

|                                                                         | <b>Yes</b>            | <b>No</b>             | <b>Unsure</b>         |
|-------------------------------------------------------------------------|-----------------------|-----------------------|-----------------------|
| I feel comfortable performing pediatric clinical assessments            | <input type="radio"/> | <input type="radio"/> | <input type="radio"/> |
| I feel comfortable managing children with strabismus                    | <input type="radio"/> | <input type="radio"/> | <input type="radio"/> |
| I feel comfortable managing children with retinopathy of prematurity    | <input type="radio"/> | <input type="radio"/> | <input type="radio"/> |
| I feel comfortable performing strabismus surgery                        | <input type="radio"/> | <input type="radio"/> | <input type="radio"/> |
| I can prescribe low-vision rehabilitative therapies and optical devices | <input type="radio"/> | <input type="radio"/> | <input type="radio"/> |

**16) Which nonclinical competency areas of ophthalmology practice did you receive training in during residency?**

|                                                | <b>Yes</b>            | <b>No</b>             | <b>Unsure</b>         |
|------------------------------------------------|-----------------------|-----------------------|-----------------------|
| Professionalism                                | <input type="radio"/> | <input type="radio"/> | <input type="radio"/> |
| Practice management skills                     | <input type="radio"/> | <input type="radio"/> | <input type="radio"/> |
| Interpersonal and communication skills         | <input type="radio"/> | <input type="radio"/> | <input type="radio"/> |
| Medical Knowledge                              | <input type="radio"/> | <input type="radio"/> | <input type="radio"/> |
| Systems-based practice                         | <input type="radio"/> | <input type="radio"/> | <input type="radio"/> |
| Relationships with allied health professionals | <input type="radio"/> | <input type="radio"/> | <input type="radio"/> |
| Information about practice settings/models     | <input type="radio"/> | <input type="radio"/> | <input type="radio"/> |
| Staffing and administration skills             | <input type="radio"/> | <input type="radio"/> | <input type="radio"/> |
| Information management and technology          | <input type="radio"/> | <input type="radio"/> | <input type="radio"/> |
| Relationships with referring doctors           | <input type="radio"/> | <input type="radio"/> | <input type="radio"/> |
| Relationships with referring doctors           | <input type="radio"/> | <input type="radio"/> | <input type="radio"/> |

**Academic Performance**

**17) How many times have you taken the OKAP exams?**

- 0
- 1
- 2
- 3
- >3

**18) During your training, do you feel you were given adequate and timely feedback in the following setting(s)?**

|                                                       | <b>Yes</b>            | <b>No</b>             | <b>Unsure</b>         |
|-------------------------------------------------------|-----------------------|-----------------------|-----------------------|
| Clinic/outpatient                                     | <input type="radio"/> | <input type="radio"/> | <input type="radio"/> |
| Operating room                                        | <input type="radio"/> | <input type="radio"/> | <input type="radio"/> |
| Opportunity to discuss progress with Program Director | <input type="radio"/> | <input type="radio"/> | <input type="radio"/> |

**19) During your PGY-4 year, what was your on-call frequency?**

- 1:2    1:3    1:4  
 1:5    1:6    1:7  
 1:8    No Call

**20) Did your program have protected study time prior to your OKAP?**

- No  
 Yes, but too little  
 Yes, just about right  
 Yes, too much time

**21) What methods did you use to prepare for the OKAP? Check all that apply**

- Individual study  
 Review sessions with staff  
 Review sessions with peers  
 Simulated exams  
 Review course offered by the residency program  
 Other review course

**22) Did you feel your training program prepared you adequately to perform well on the OKAP?**

- Yes  
 No

**23) Did any factors negatively affect your performance on the OKAP? Select all that apply.**

- Nothing negatively affected my performance  
 Continuing clinic duties while studying  
 Continuing call duties while studying  
 Inadequate clinical exposure during residency  
 Inadequate teaching during residency

---

**Thank you for taking our survey. Your response is very important to us.**
